# Supplementary material
Source: PubMed Central journal article supplement (PMC3846538)
Supplement: NIHMS3704-supplement-supplement_1.pdf [file NIHMS3704-supplement-supplement_1.pdf]

**Supplemental Table: CLL patients characteristics and clinical treatment.**

| Patients                  | Sex<br>(F:M<br>ratio) | Age, yr<br>(mean;<br>range) | Rai stage<br>(0:I-II:III-IV<br>ratio) | Binet<br>(A:B:C<br>ratio) | Lymphocytes<br>count x 10 <sup>9</sup> /l<br>(mean;<br>range) | WBC count<br>x 10 <sup>9</sup> /l<br>(mean;<br>range) | IgVh<br>mutation<br>(%) | Clinical<br>Treatment<br>(CLB:Flu<br>ratio) |
|---------------------------|-----------------------|-----------------------------|---------------------------------------|---------------------------|---------------------------------------------------------------|-------------------------------------------------------|-------------------------|---------------------------------------------|
| 1                         | M                     | 62                          | 0                                     | A                         | 37.2                                                          | 43.2                                                  | 6.7                     | No                                          |
| 2                         | F                     | 82                          | II                                    | B                         | 147.6                                                         | 162.2                                                 | 6.9                     | No                                          |
| 3                         | M                     | 76                          | IV                                    | C                         | 68.1                                                          | 74.0                                                  | 11.2                    | No                                          |
| 4                         | F                     | 73                          | I                                     | B                         | 59.4                                                          | 66.7                                                  | 8.0                     | No                                          |
| 5                         | M                     | 60                          | I                                     | A                         | 71.2                                                          | 83.8                                                  | n.d                     | No                                          |
| 6                         | M                     | 80                          | III                                   | C                         | 50.6                                                          | 59.5                                                  | 0.0                     | No                                          |
| 7                         | M                     | 54                          | I                                     | B                         | 41.6                                                          | 52.7                                                  | n.d                     | No                                          |
| 8                         | M                     | 63                          | IV                                    | C                         | 56.5                                                          | 63.1                                                  | n.d                     | No                                          |
| 9                         | M                     | 72                          | 0                                     | A                         | 80.6                                                          | 91.6                                                  | 8.3                     | No                                          |
| 10                        | F                     | 44                          | IV                                    | C                         | 117.2                                                         | 126.0                                                 | 0.0                     | No                                          |
| 11                        | M                     | 62                          | II                                    | B                         | 112.7                                                         | 142.6                                                 | 1.0                     | No                                          |
| <b>patients<br/>1-11</b>  | (3:9)                 | (66.2;<br>44-82)            | (2:5:4)                               | (3:4:4)                   | (76.6; 37.2-<br>147.6)                                        | (87.8;43.2-<br>162.2)                                 |                         |                                             |
| 12                        | F                     | 76                          | III                                   | C                         | 49.4                                                          | 53.7                                                  | 1.6                     | CLB                                         |
| 13                        | F                     | 81                          | IV                                    | C                         | 123.5                                                         | 141.9                                                 | 0.0                     | CLB                                         |
| 14                        | M                     | 76                          | IV                                    | C                         | 39.7                                                          | 83.5                                                  | 0.0                     | CLB                                         |
| 15                        | M                     | 65                          | IV                                    | C                         | 152.6                                                         | 164.1                                                 | 7.2                     | CLB                                         |
| 16                        | M                     | 88                          | IV                                    | C                         | 83.7                                                          | 95.1                                                  | n.d                     | CLB                                         |
| 17                        | F                     | 87                          | II                                    | A                         | 38.7                                                          | 50.3                                                  | 5.3                     | CLB                                         |
| 18                        | M                     | 89                          | I                                     | B                         | 26.6                                                          | 36.9                                                  | n.d                     | Flu/cytosan                                 |
| 19                        | F                     | 60                          | IV                                    | C                         | 43.8                                                          | 48.7                                                  | 4.0                     | Flu                                         |
| 20                        | M                     | 78                          | II                                    | A                         | 57.0                                                          | 75.0                                                  | n.d                     | CLB/Flu                                     |
| 21                        | M                     | 70                          | II                                    | B                         | 223.0                                                         | 247.8                                                 | 9.1                     | CLB                                         |
| 22                        | M                     | 65                          | I                                     | A                         | 43.7                                                          | 52.7                                                  | 0.0                     | CLB                                         |
| <b>patients<br/>12-22</b> | (4:7)                 | (76; 60-<br>89)             | (0:5:6)                               | (3:2:6)                   | (80.2;26.6-<br>223.0)                                         | (95.4;36.9-<br>247.8)                                 |                         | (9:3)                                       |
| <b>patients<br/>1-22</b>  | (7:16)                | (71; 44-<br>89)             | (2:10:10)                             | (6:6:10)                  | (78.4;26.6-<br>223.0)                                         | (91.6;36.9-<br>247.8)                                 |                         |                                             |
| 23                        | F                     | 68                          | II                                    | B                         | 128.0                                                         | 115.5                                                 | 0.0                     | No                                          |
| 24                        | F                     | 70                          | IV                                    | C                         | 212.0                                                         | 230.0                                                 | n.d                     | Flu                                         |

Summary of the clinical characteristics of 24 B-CLL patients that provided lymphocytes for this work. Rai classification separates CLL into low (stage 0), intermediate (stage I & II) and high (stage III& IV) risk categories. Binet staging classifies CLL according to the number of lymphoid tissues that are involved, as well as the presence of low red blood cell count or low number of blood platelets. IgVH: Percentage of somatic mutations in the immunoglobulin variable region genes. WBC: white blood count, CLB: chlorambucil, Flu: fludarabine, n.d.: not determined

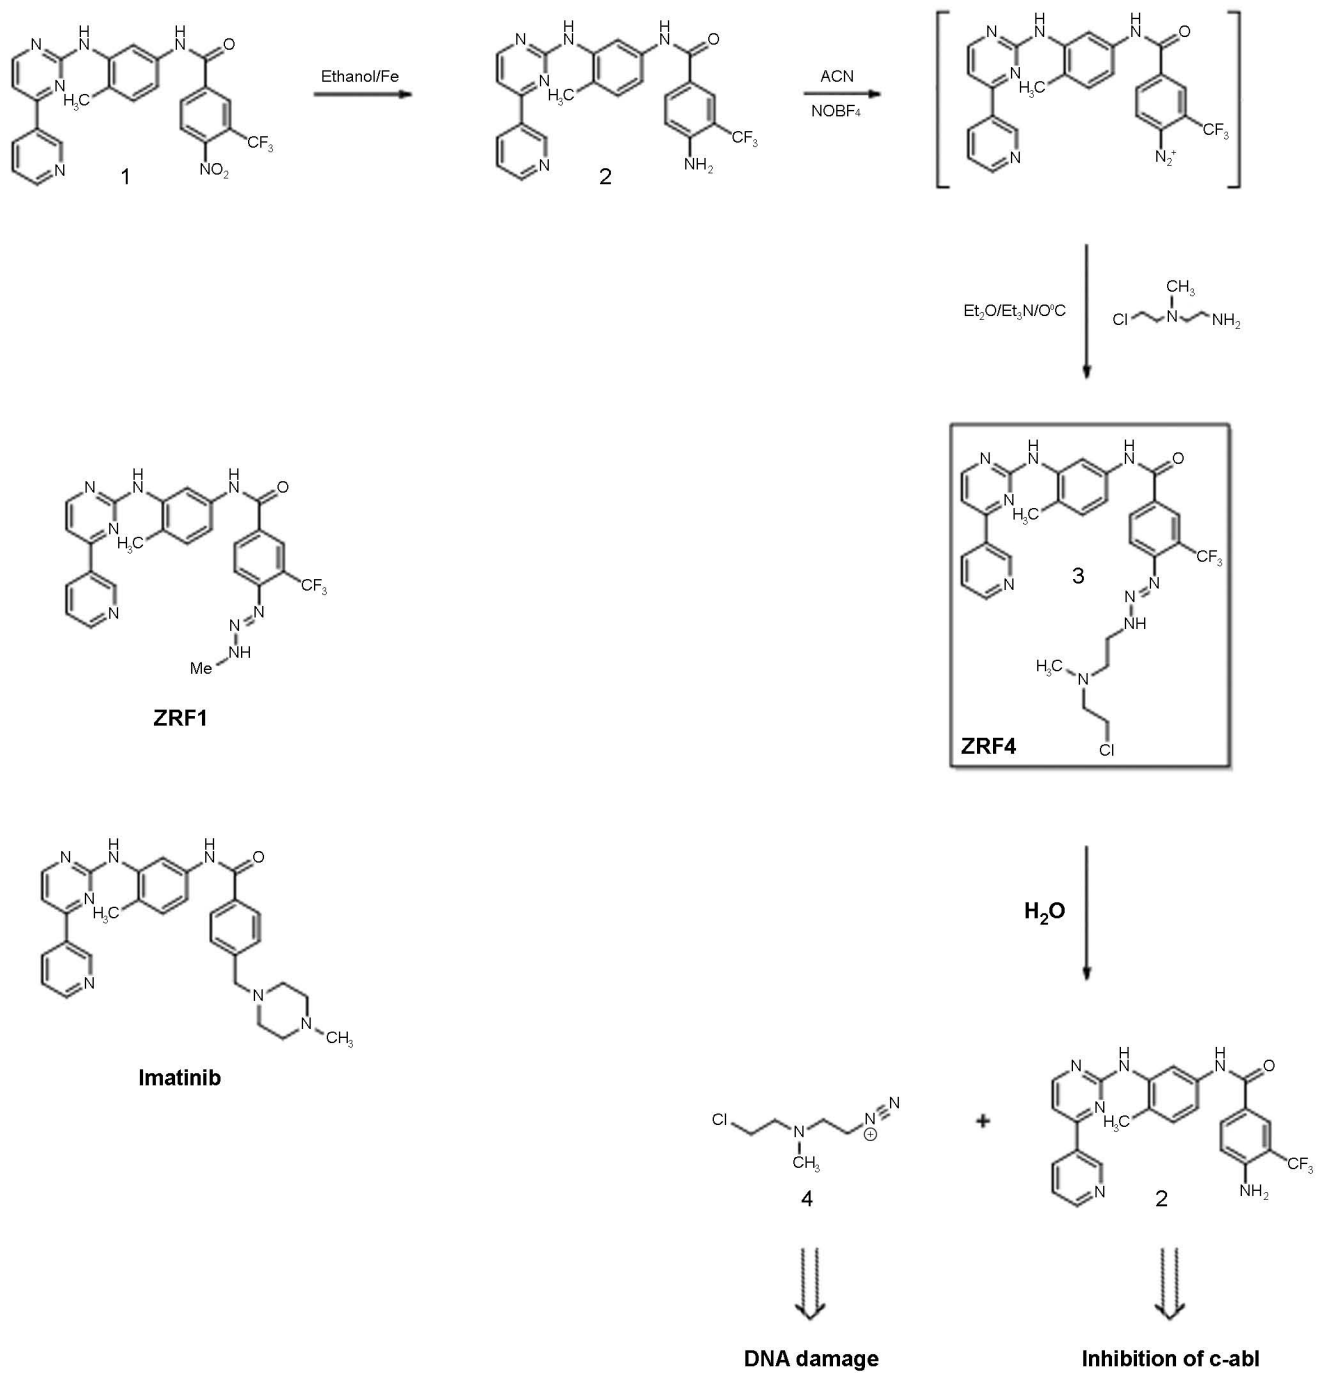

**Supplemental figure:** The synthesis of ZRF4 proceeded according to an adaptation of strategy developed for ZRF1, which was shown to be readily hydrolyzed to amine **2** in cell culture medium at 37°C (6). Briefly, the nitro compound **1** was obtained as previously described (7) and reduced with Fe in hot ethanol, water and acetic acid to provide amine **2**. Diazotization of **2** with nitrosonium tetrafluoroborate in dry acetonitrile at 0°C followed by addition of *N*-(2-chloroethyl)-*N*-methylethylenediamine amine and neutralization with triethylamine gave the combi-molecule **ZRF4**.
